# Supplementary material
Source: Springer Nature journal article supplement (https://www.springermedizin.de/resource/supplementary/12885_2009_1972_MOESM3_ESM.pdf/9460216)

### Average expression stability values of remaining control genes

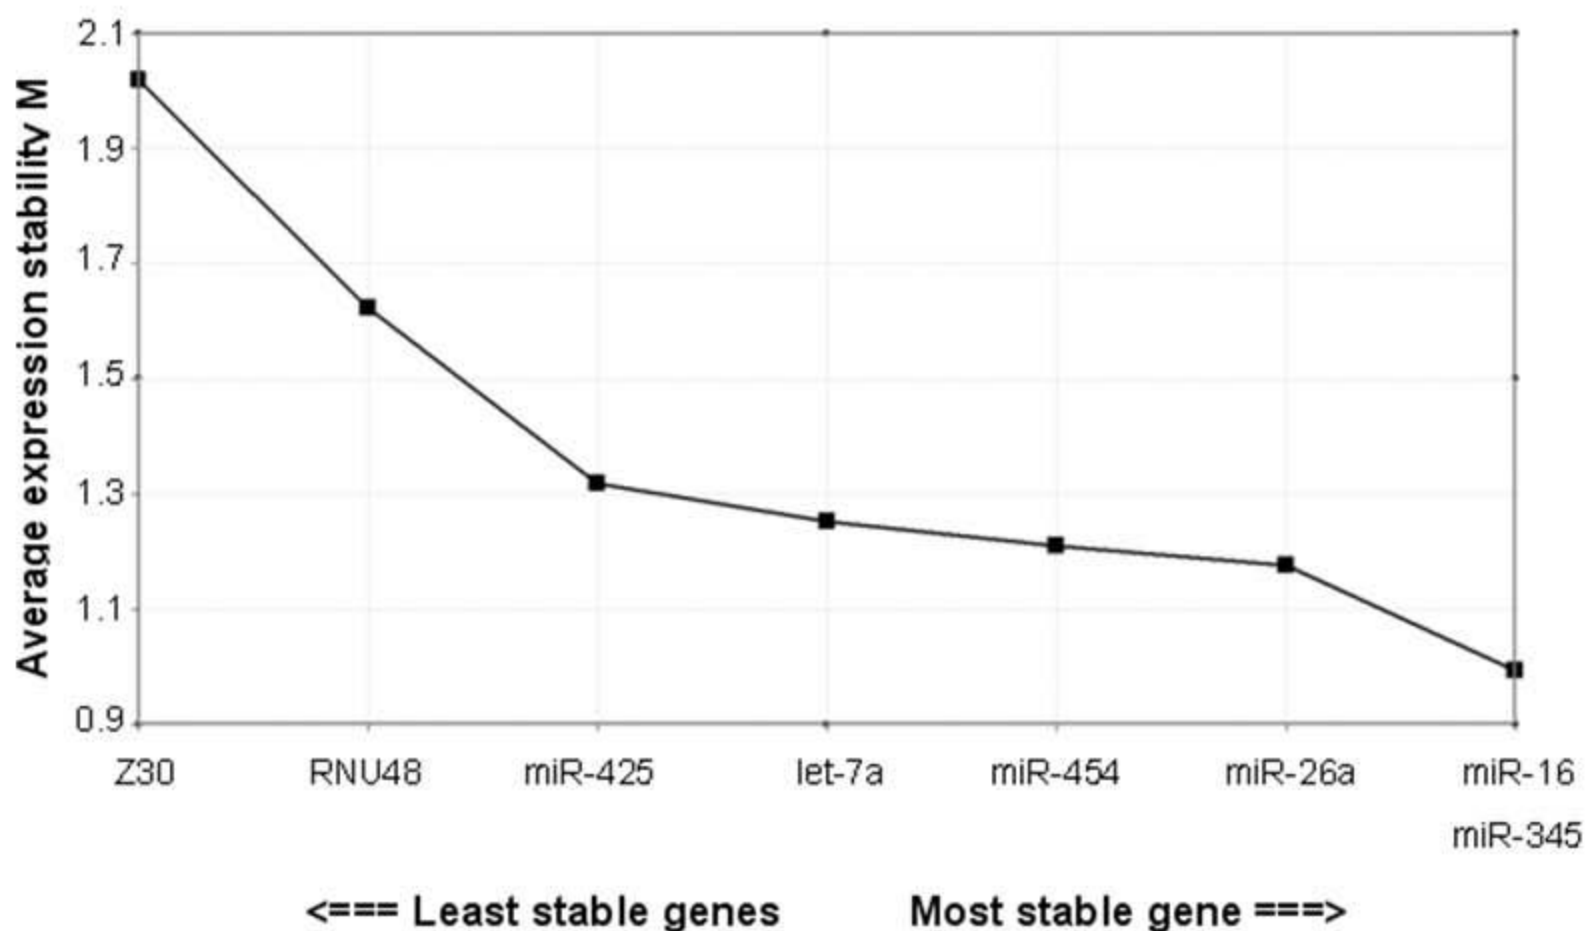

### Determination of the optimal number of reference genes for normalisation

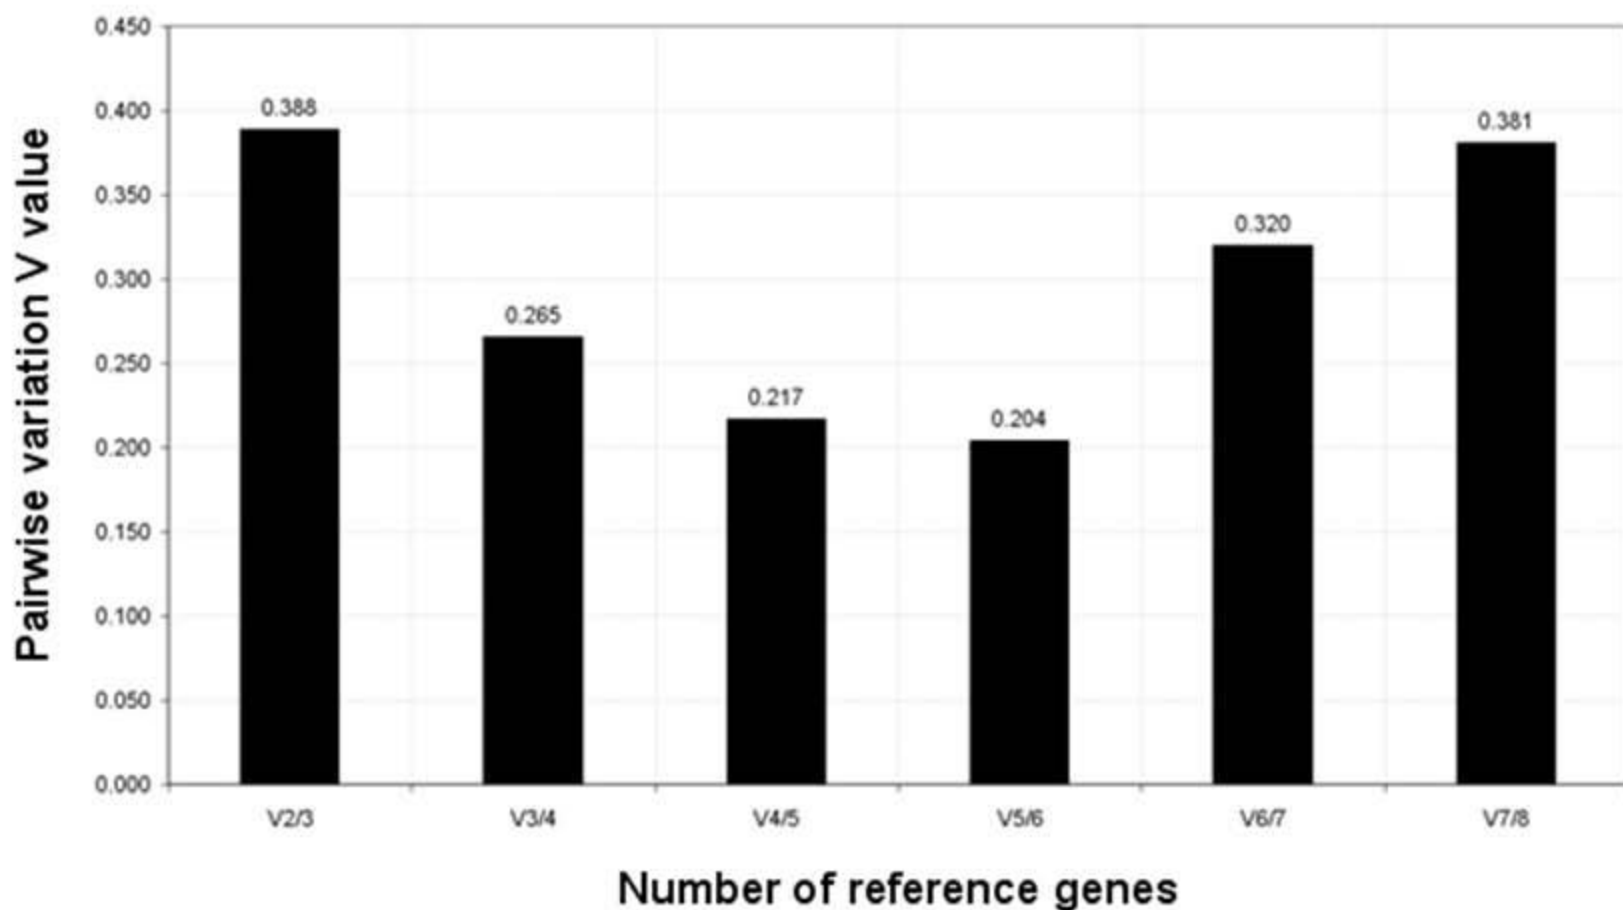

Supplement: MOESM3 [file 9460216]
